# Supplementary material for: Electrocardiographic abnormalities in patients with cardiomyopathies
Source: Heart Fail Rev. 2023 Oct 17;29(1):151–64. doi: 10.1007/s10741-023-10358-7 (PMC10904564; doi:10.1007/s10741-023-10358-7)
Supplement: Supplementary file 1 — Supplementary file1 (DOCX 1605 KB) [file 10741_2023_10358_MOESM1_ESM.docx]

**Supplemental material**

**Electrocardiographic abnormalities in patients with cardiomyopathies**

Alberto Aimo1,2,Agnese Milandri3, Andrea Barison1,2, Andrea Pezzato4, Paolo Morfino1, Giuseppe Vergaro1,2, Marco Merlo4, Alessia Argirò5, Iacopo Olivotto6, Michele Emdin1,2, Gherardo Finocchiaro7,8, Gianfranco Sinagra4, Perry Elliott9, Claudio Rapezzi9┼

1. Interdisciplinary Center for Health Sciences, Scuola Superiore Sant’Anna, Pisa, Italy; 2. Cardiology Division, Fondazione Toscana Gabriele Monasterio, Pisa, Italy; 3. Cardiology Unit, Bentivoglio Hospital, Bologna, Italy; 4. Center for Diagnosis and Management of Cardiomyopathies; Cardiothoracovascular Department Azienda Sanitaria Universitaria Giuliano Isontina (ASUGI) and University of Trieste, Italy; 5. Careggi University Hospital, Florence, Italy; 6. Department of Experimental and Clinical Medicine, University of Florence, Meyer Children Hospital Florence, Italy; 7. Royal Brompton and Harefield Hospital, London, UK; 8. St George’s University of London, UK; 9. UCL Centre for Heart Muscle Disease and lead of the Inherited Cardiovascular Disease Unit, Bart's Heart Centre, London, UK; 10. Cardiology Centre, University of Ferrara, Italy. ┼ deceased.


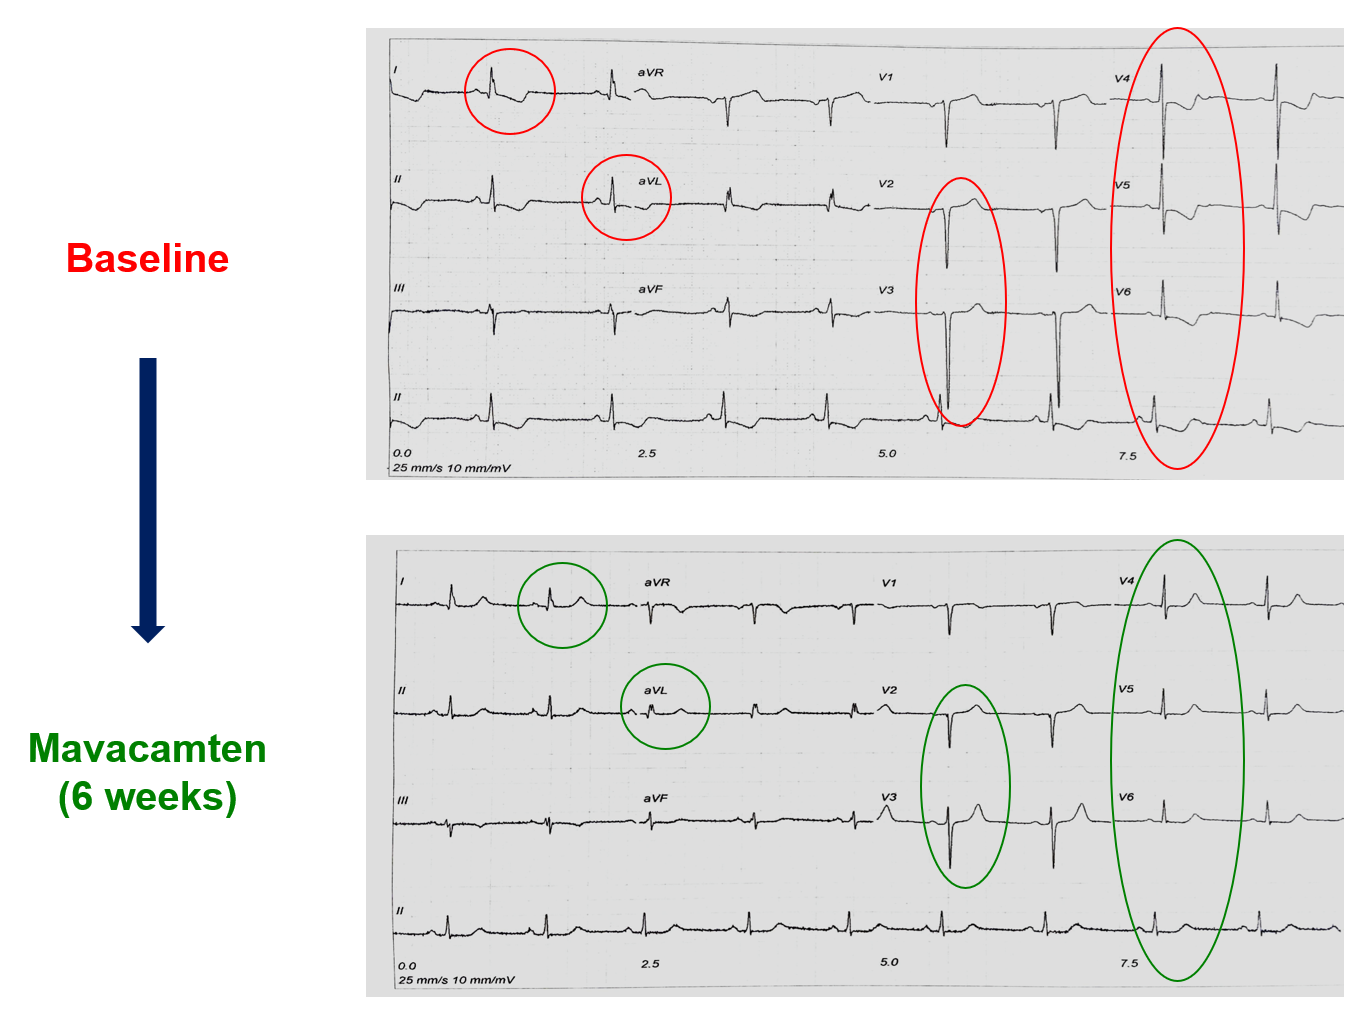


**Supplemental Figure 1. Regression of electrocardiographic abnormalities in a 50-year-old patient with hypertrophic cardiomyopathy following therapy with mavacamten for 6 weeks.**

Courtesy of Iacopo Olivotto.


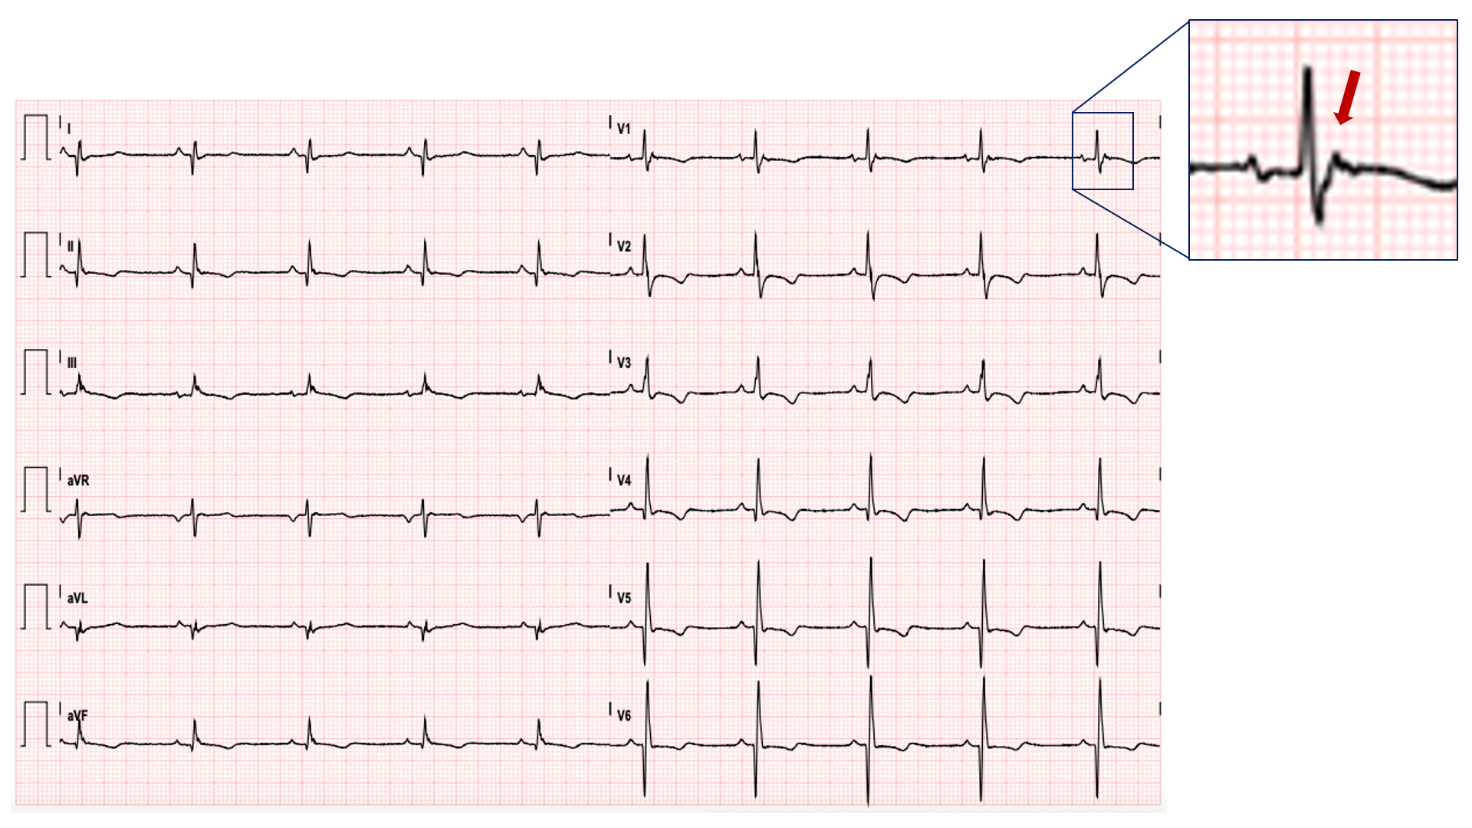


**Supplemental Figure 2. The epsilon wave.**
